# Supplementary material for: Understanding multi-scale battery degradation with a macro-to-nano zoom through its hierarchy
Source: Royal Society of Chemistry journal article supplement (doi:10.1039/d1ta02262h), 2021-01-01
Supplement: d1ta02262h1.pdf [file d1ta02262h1.pdf]

## Supporting Information

### Understanding the multi-scale battery degradation with a macro-to-nano zoom through its hierarchy

*Guibin Zan,<sup>†a</sup> Jin Zhang,<sup>†a</sup> Federico Monaco,<sup>†b</sup> Sheraz Gul,<sup>c</sup> Guannan Qian,<sup>a</sup> Jizhou Li,<sup>a</sup>  
David J. Vine,<sup>c</sup> Peter Cloetens,<sup>b</sup> Wenbing Yun,<sup>c</sup> Piero Pianetta<sup>a</sup> and Yijin Liu <sup>\*a</sup>*

<sup>a</sup> Stanford Synchrotron Radiation Lightsource, SLAC National Accelerator Laboratory, Menlo Park, California 94025, United States.

<sup>b</sup> ESRF-The European Synchrotron, Grenoble 38043, France.

<sup>c</sup> Sigray Inc., Concord, CA 94520, USA.

<sup>†</sup> *G. Zan, J. Zhang, and F. Monaco contributed equally to this work.*

*Corresponding Author*

*\* Email: liuyijin@slac.stanford.edu (Y.L.)*

## Electrochemical measurements

We carried out a systematic investigation on an 18650-type commercial LIBs with polycrystalline  $\text{LiNi}_{0.5}\text{Co}_{0.2}\text{Mn}_{0.3}\text{O}_2$  cathode that failed the factory line's quality control inspection (QCI) due to a self-discharging effect. A standard battery cycler (Shenzhen Neware, CT-4008T-5V6A-S1) was used to perform the galvanostatic charging/discharging tests. The battery was cycled at 2.5-4.2 V with a current density of 2 A/4 A (charging/discharging) for 1 time (see Fig. S1). For the self-discharging test, the battery was firstly charged to 4.2 V with a current density of 1 A, then rested for 25 days at room temperature. Fig. S2 shows the self-discharge curves of 18650-type lithium-ion battery.

## Supplementary Figures

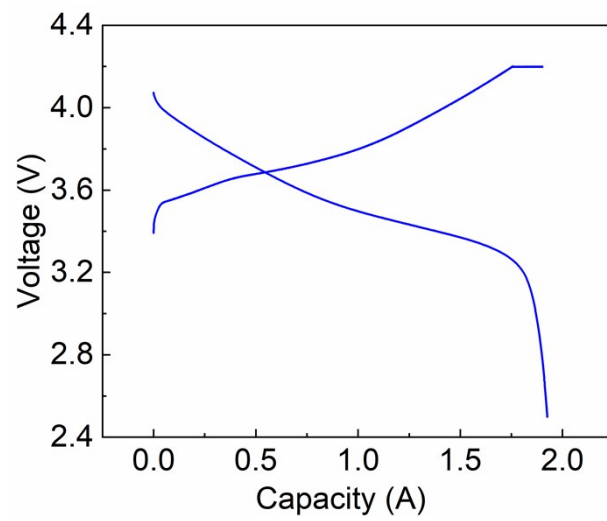

Fig. S1 The charging/discharging curves of 18650-type lithium-ion battery at 2.5-4.2 V with a rate of 1 C/2 C (1 C=2 A).

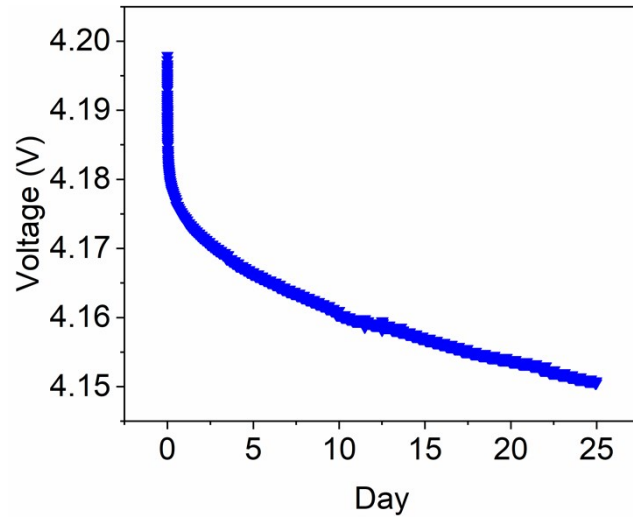

Fig. S2 The self-discharge curves of 18650-type lithium-ion battery.

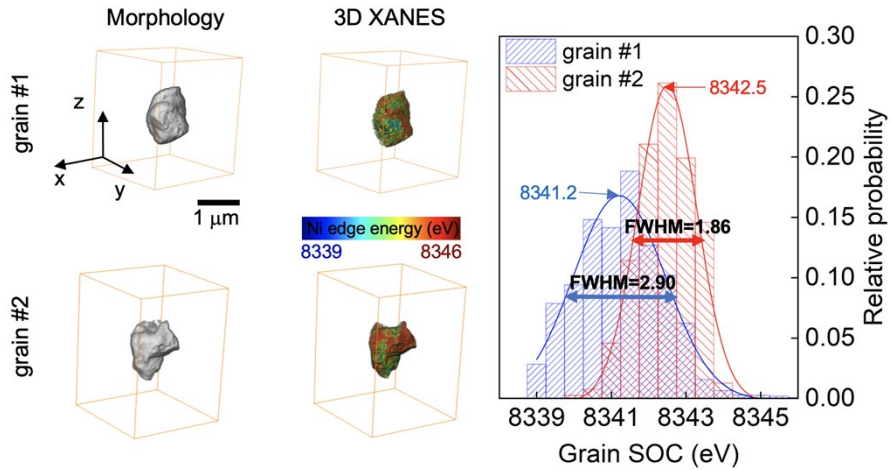

Fig. S3 The inter-granular and intra-granular heterogeneities between two randomly selected primary grains. The 3D morphology and Ni K-edge energy heterogeneity of two different grains are shown on the left. The relative probability distributions of the Ni K-edge energy value for these two grains are plotted on the right. Grain #2 shows a higher averaged Ni K-edge energy value at 8342.5 eV, indicating that grain #2 is more oxidized than grain 1#. The FWHM of the curves on the right effectively measures the degree of energy spread. Grain 1# appears to be more non-uniform than grain 2#.
